# Supplementary material for: Expediting polysulfide catalytic conversion for lithium–sulfur batteries via in situ implanted ultrafine Fe3O4 nanocrystals in carbon nanospheres
Source: Royal Society of Chemistry journal article supplement (doi:10.1039/d0ta08289a), 2020-01-01
Supplement: d0ta08289a1.pdf [file d0ta08289a1.pdf]

## Supporting Information

### **Expediting Polysulfides Catalytic Conversion for Lithium-Sulfur Battery via In-situ Implanted Ultrafine Fe<sub>3</sub>O<sub>4</sub> Nanocrystals in Carbon Nanospheres**

Zhe Su,<sup>a‡</sup> Mingqi Chen,<sup>a‡</sup> Yankai Pan,<sup>a</sup> Yajiang Liu,<sup>a</sup> Hai Xu,<sup>a</sup> Yayun Zhang<sup>\*a</sup> and Donghui Long<sup>\*ab</sup>

<sup>a</sup> State Key Laboratory of Chemical Engineering, East China University of Science and Technology, Shanghai 200237, China.

<sup>b</sup> Key Laboratory of Specially Functional Polymeric Materials and Related Technology, East China University of Science and Technology, Shanghai 200237, China.

‡These authors contributed equally to this work.

\* Corresponding author:

Tel: +86 21 64252924. Fax: +86 21 64252914.

E-mail: longdh@mail.ecust.edu.cn. (Donghui Long); yy.zhang@ecust.edu.cn.(Yayun Zhang)

**Fig. S1** SEM image of ferrous gluconate precursor.

**Fig. S2** TEM image of porous carbon nanospheres (PCNSs).

**Fig. S3** High-resolution C 1s XPS spectrum curves of Fe<sub>3</sub>O<sub>4</sub>/CNSs.

**Fig. S4** Density functional theory (DFT) calculations of adsorption energies of S<sub>8</sub> and S-containing clusters (Li<sub>2</sub>S<sub>x</sub>, x=8, 6, 4, 2, 1) on Fe<sub>3</sub>O<sub>4</sub>(400) (a-f) and amorphous carbon (g-i), respectively.

**Fig. S5** Illustration of the electrode reactions for the redox peaks.

**Fig. S6** CV curves of Li<sub>2</sub>S<sub>6</sub> symmetrical cells with (a) Fe<sub>3</sub>O<sub>4</sub>/CNSs and (b) PCNSs sulfur-free electrodes at different scan rate.

**Fig. S7** SEM image of commercial Celgard 2500 polypropylene membrane (PP).

**Fig. S8** The digital photographs of Fe<sub>3</sub>O<sub>4</sub>/CNSs functionalized separator (a) pristine polypropylene membrane side, (b) after folding.

**Fig. S9** Digital photo of electrolyte wettability experimental for the (a) Fe<sub>3</sub>O<sub>4</sub>/CNSs-PP separator and (b) blank PP separator.

**Fig. S10** Thermogravimetric analysis (TGA) curve and derivative thermogravimetric (DTG) curve of pure sulfur cathode under N<sub>2</sub> atmosphere.

**Fig. S11** Electrochemical impedance spectroscopy (EIS) plots for the Fe<sub>3</sub>O<sub>4</sub>/CNSs-PP cell, PCNSs-PP cell and blank PP cell before cycles.

**Fig. S12** Galvanostatic charge/discharge voltage profiles for Fe<sub>3</sub>O<sub>4</sub>/CNSs-PP cell, PCNSs-PP cell and blank PP cell at a current density of 0.2 C.

**Fig. S13** Galvanostatic charge/discharge voltage profiles for (a) Fe<sub>3</sub>O<sub>4</sub>/CNSs-PP cell, (b) PCNSs-PP cell and (c) blank PP cell at different current density.

**Fig. S14** CV curves of (a) Fe<sub>3</sub>O<sub>4</sub>/CNSs-PP cell, (b) PCNSs-PP cell and (c) blank PP cell at different scan

rate. (d-f) Diffusion coefficient linear fitting plots of lithium ion at peak A~C, respectively.

**Table S1** Detailed pore parameters of Fe<sub>3</sub>O<sub>4</sub>/CNSs and PCNSs.

**Table S2** Detailed average rate capacities of Fe<sub>3</sub>O<sub>4</sub>/CNSs-PP cell, PCNSs-PP cell and blank PP cell.

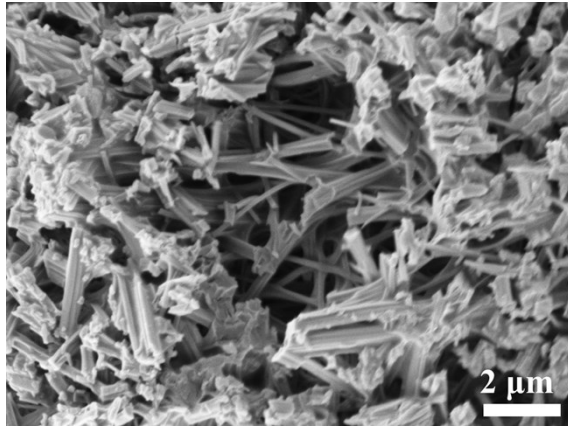

**Fig. S1** SEM image of ferrous gluconate precursor.

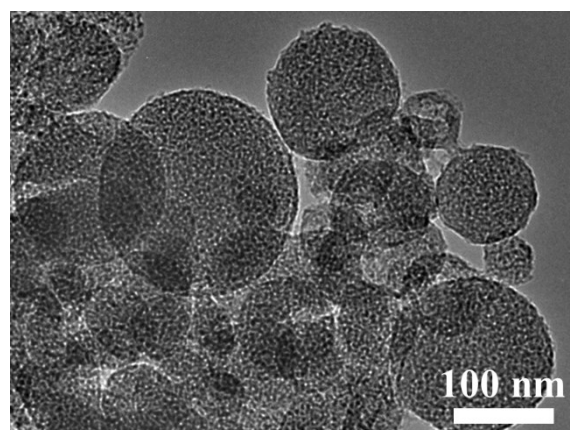

**Fig. S2** TEM image of porous carbon nanospheres (PCNSs).

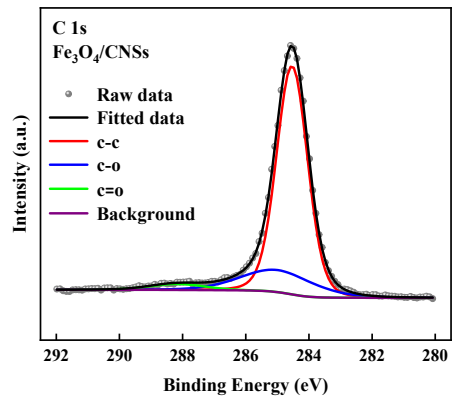

**Fig. S3** High-resolution C 1s XPS spectrum curves of Fe<sub>3</sub>O<sub>4</sub>/CNSs

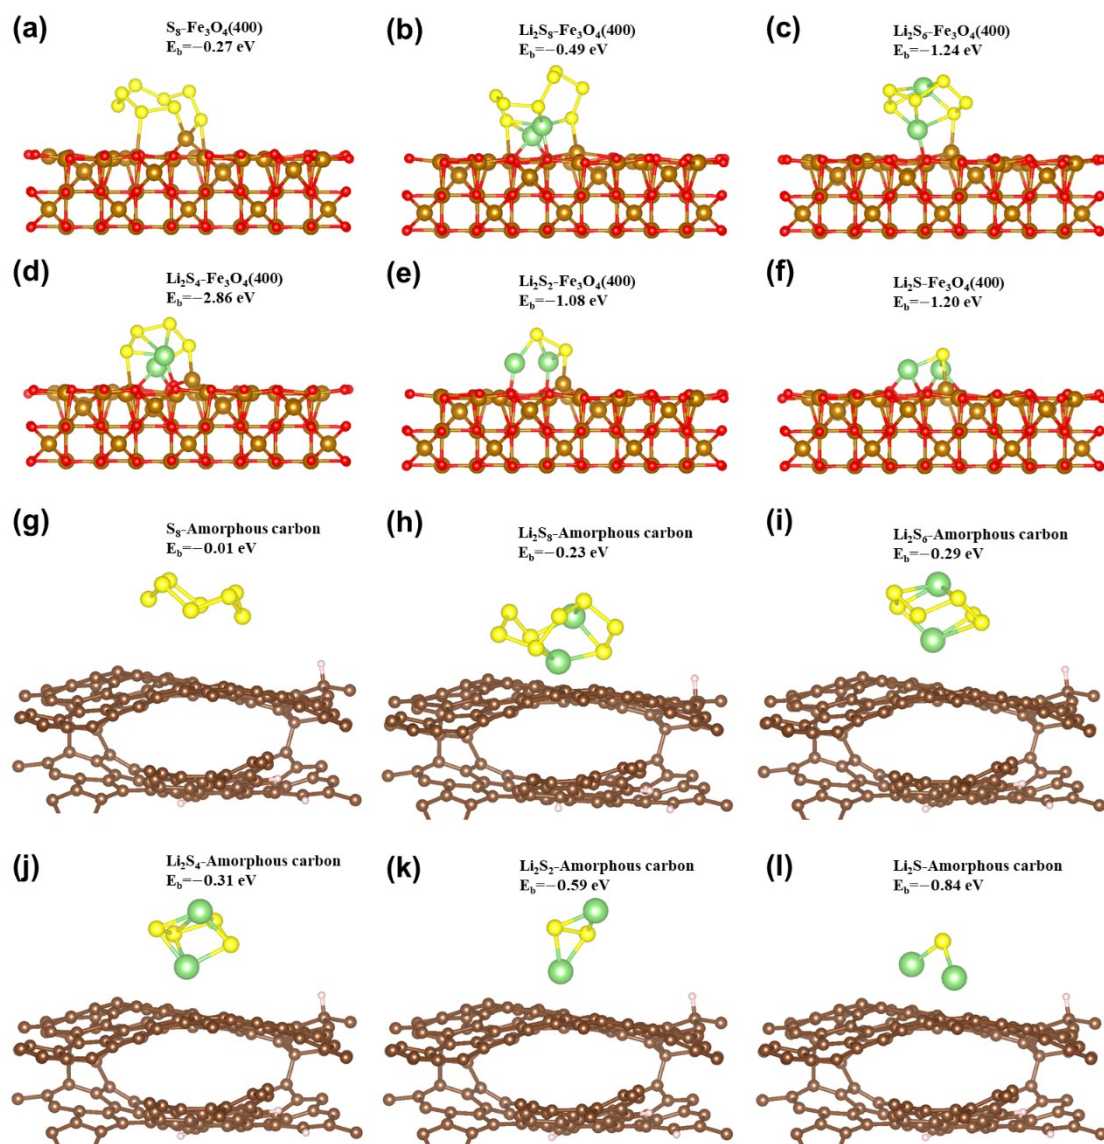

**Fig. S4** Density functional theory (DFT) calculations of adsorption energies of  $S_8$  and S-containing clusters ( $Li_2S_x$ ,  $x=8, 6, 4, 2, 1$ ) on  $Fe_3O_4(400)$  (a-f) and amorphous carbon (g-l), respectively.

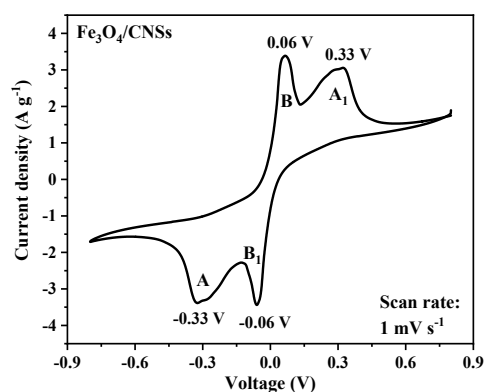

**Fig. S5** Illustration of the electrode reactions for the redox peaks.

Since  $\text{Li}_2\text{S}_6$  was the initial redox active species in the electrolyte, it is reasonable to assume that the  $\text{Li}_2\text{S}_6$  conversion process on the working electrode can be described as four step reactions as follows:  $\text{Li}_2\text{S}_6$  was reduced to  $\text{Li}_2\text{S}$  (or  $\text{Li}_2\text{S}_2$ ) on the working electrode and oxidized to sulfur on the counter electrode in the cathodic scan peak A (-0.33 V). In the following anodic scan, the rebuilding of  $\text{Li}_2\text{S}_6$  by the oxidation of  $\text{Li}_2\text{S}$  (or  $\text{Li}_2\text{S}_2$ ) on the working electrode and the reduction of sulfur on the counter electrode, which constituted the peak B (0.06 V).  $\text{Li}_2\text{S}_6$  was oxidized to sulfur on the working electrode and reduced to  $\text{Li}_2\text{S}$  (or  $\text{Li}_2\text{S}_2$ ) on the counter electrode in Peak  $A_1$  (0.33 V). Last, in peak  $B_1$  (-0.06 V),  $\text{Li}_2\text{S}_6$  is formed by the reduction of sulfur on the working electrode and the oxidation of  $\text{Li}_2\text{S}$  (or  $\text{Li}_2\text{S}_2$ ) on the counter electrode.<sup>1-3</sup>



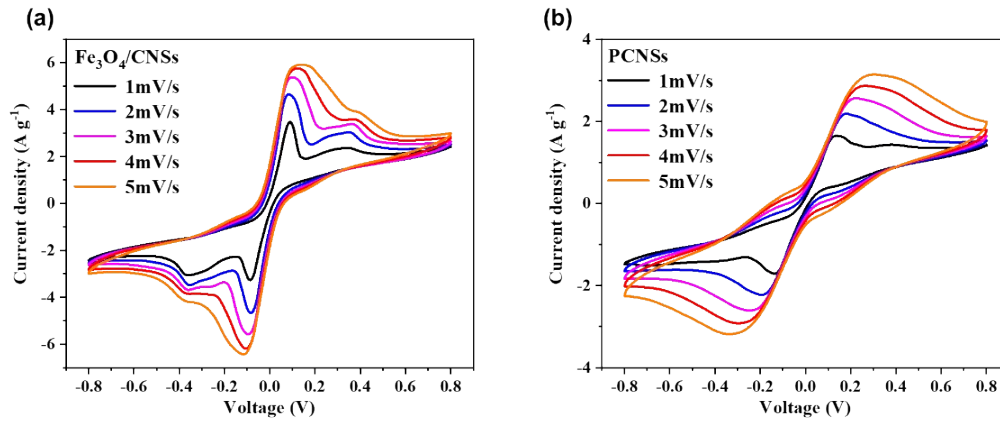

**Fig. S6** CV curves of  $\text{Li}_2\text{S}_6$  symmetrical cells with (a)  $\text{Fe}_3\text{O}_4/\text{CNSs}$  and (b) PCNSs sulfur-free electrodes at different scan rate.

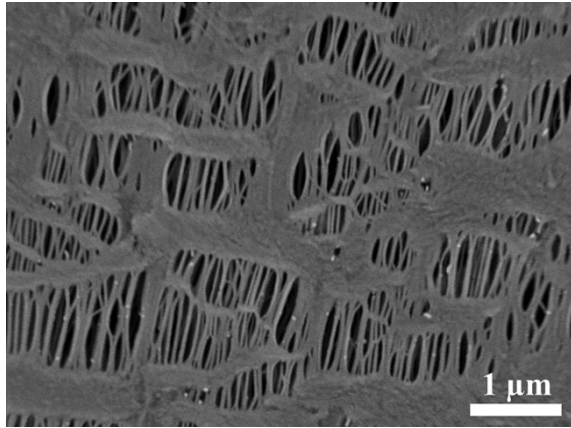

**Fig. S7** SEM image of commercial Celgard 2500 polypropylene membrane (PP).

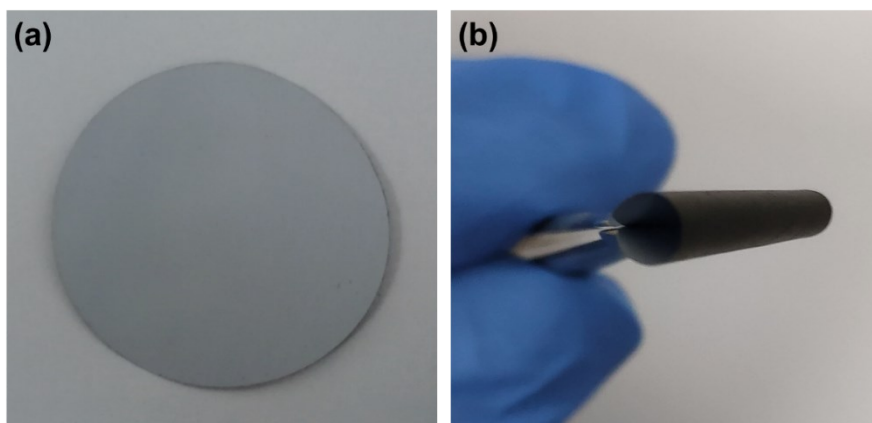

**Fig. S8** The digital photographs of  $\text{Fe}_3\text{O}_4/\text{CNSs}$  functionalized separator (a) pristine polypropylene membrane side, (b) after folding.

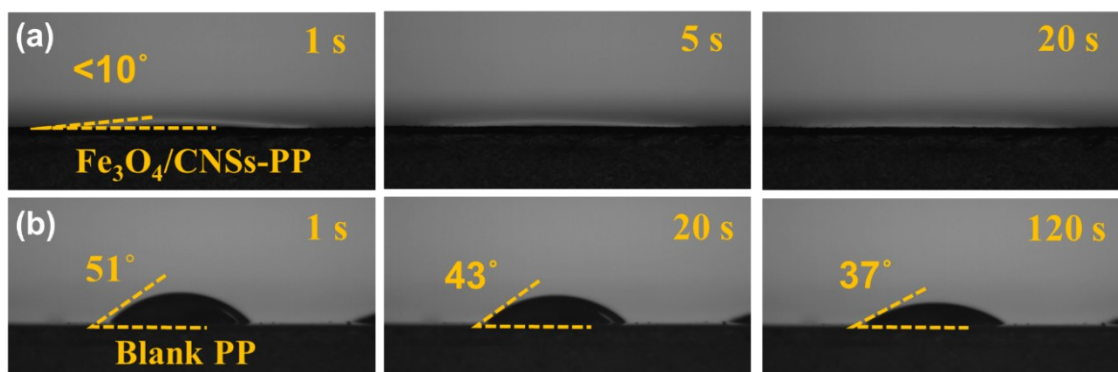

**Fig. S9** Digital photo of electrolyte wettability experimental for the (a)  $\text{Fe}_3\text{O}_4/\text{CNSs-PP}$  separator and (b) blank PP separator.

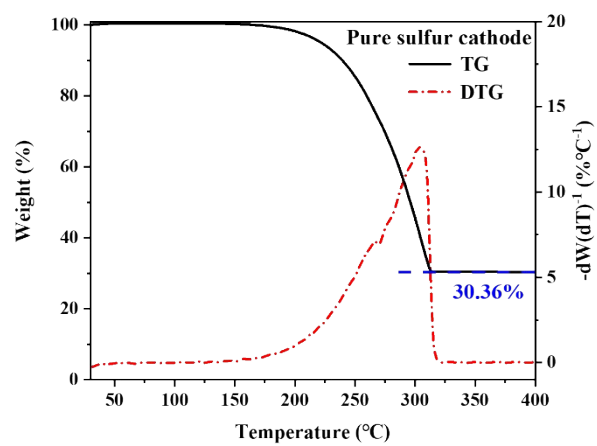

**Fig. S10** Thermogravimetric analysis (TGA) curve and derivative thermogravimetric (DTG) curve of pure sulfur cathode under  $N_2$  atmosphere.

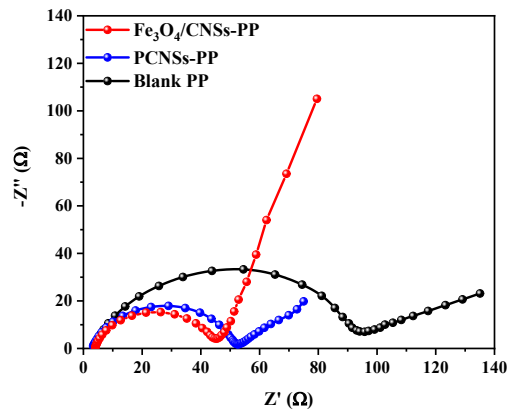

**Fig. S11** Electrochemical impedance spectroscopy (EIS) plots for the Fe<sub>3</sub>O<sub>4</sub>/CNSs-PP cell, PCNSs-PP cell and blank PP cell before cycles.

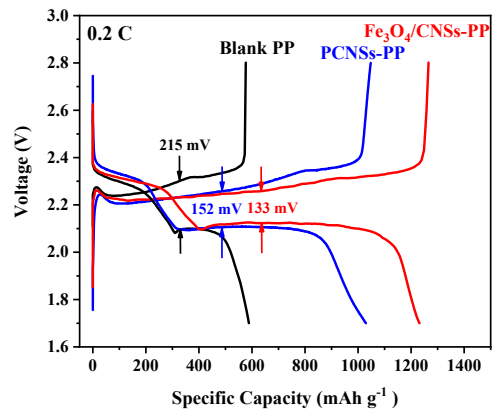

**Fig. S12** Galvanostatic charge/discharge voltage profiles for Fe<sub>3</sub>O<sub>4</sub>/CNSs-PP cell, PCNSs-PP cell and blank PP cell at a current density of 0.2 C.

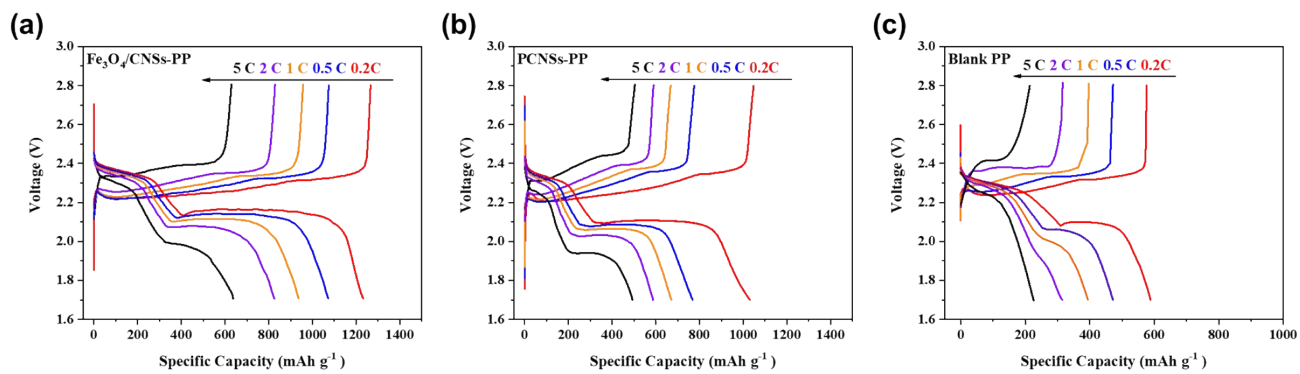

**Fig. S13** Galvanostatic charge/discharge voltage profiles for (a) Fe<sub>3</sub>O<sub>4</sub>/CNSs-PP cell, (b) PCNSs-PP cell and (c) blank PP cell at different current density.



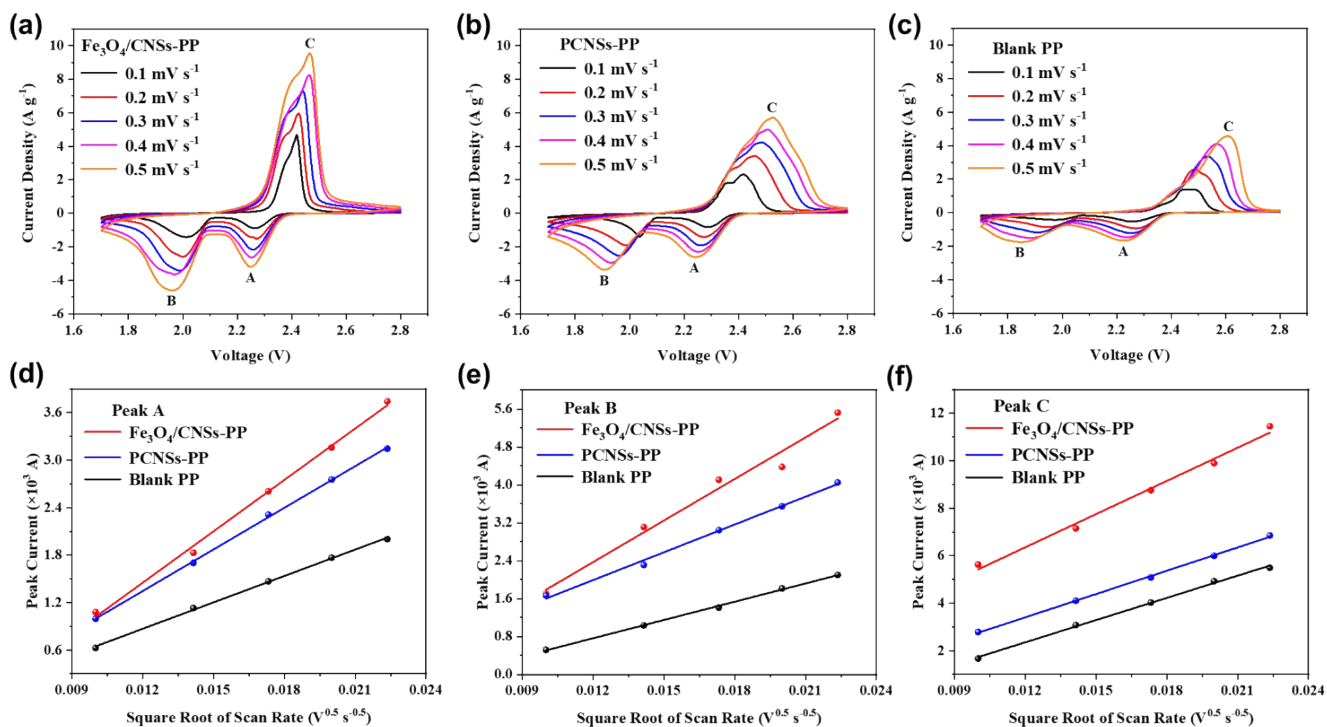

**Fig. S14** CV curves of (a)  $\text{Fe}_3\text{O}_4/\text{CNSs-PP}$  cell, (b) PCNSs-PP cell and (c) blank PP cell at different scan rate. (d-f) Diffusion coefficient linear fitting plots of lithium ion at peak A-C, respectively.

**Table S1** Detailed pore parameters of Fe<sub>3</sub>O<sub>4</sub>/CNSs and PCNSs.

| Sample                               | S <sub>BET</sub> (m <sup>2</sup> g <sup>-1</sup> ) | S <sub>Micro</sub> (m <sup>2</sup> g <sup>-1</sup> ) | V <sub>Total</sub> (cm <sup>3</sup> g <sup>-1</sup> ) | V <sub>Micro</sub> (cm <sup>3</sup> g <sup>-1</sup> ) |
|--------------------------------------|----------------------------------------------------|------------------------------------------------------|-------------------------------------------------------|-------------------------------------------------------|
| Fe <sub>3</sub> O <sub>4</sub> /CNSs | 247                                                | 73                                                   | 0.41                                                  | 0.04                                                  |
| PCNSs                                | 799                                                | 317                                                  | 0.84                                                  | 0.16                                                  |

**Table S2** Detailed average rate capacities of Fe<sub>3</sub>O<sub>4</sub>/CNSs-PP cell, PCNSs-PP cell and blank PP cell.

| Rate  | Fe <sub>3</sub> O <sub>4</sub> /CNSs-PP<br>mAh g <sup>-1</sup> | PCNSs-PP<br>mAh g <sup>-1</sup> | Blank PP<br>mAh g <sup>-1</sup> |
|-------|----------------------------------------------------------------|---------------------------------|---------------------------------|
| 0.2 C | 1225                                                           | 959                             | 614                             |
| 0.5 C | 1068                                                           | 755                             | 496                             |
| 1 C   | 947                                                            | 669                             | 431                             |
| 2 C   | 828                                                            | 596                             | 358                             |
| 5C    | 649                                                            | 500                             | 228                             |

## References:

1. H. Lin, L. Yang, X. Jiang, G. Li, T. Zhang, Q. Yao, G. W. Zheng and J. Y. Lee, *Energy Environ. Sci.*, 2017, 10, 1476-1486.
2. H. Lin, S. Zhang, T. Zhang, H. Ye, Q. Yao, G. W. Zheng and J. Y. Lee, *Adv. Energy Mater.*, 2018, 8.
3. P. Guo, K. Sun, X. Shang, D. Liu, Y. Wang, Q. Liu, Y. Fu and D. He, *Small*, 2019, 15, 1902363.
